# Supplementary material for: The Prevalence of Human T-Lymphotropic Virus Infection among Blood Donors in Southeast China, 2004-2013
Source: PLoS Negl Trop Dis. 2015 Apr 1;9(4):e0003685. doi: 10.1371/journal.pntd.0003685 (PMC4382043; doi:10.1371/journal.pntd.0003685)
Supplement: S1 Table — (XLS) [file pntd.0003685.s002.xls]

## Sheet: Sequence Data
Sequence	L55	Geographic Origin	Continent	Subtype	Subgroup
D13784.1.1.complete genome.HS-35.8400...	L	Caribbean	Central America	a	C
L03561.2.2.complete genome..9043.a.A	.	Germany	Europe	a	A
J02029.1.3.complete genome.ATK-1.9068...	.	Japan	Asia	a	B
AF139170.1.4.complete genome..9031.a.A	.	USA	North America	a	A
AF042071.1.5.complete genome.RKI3-Ger...	.	Germany	Europe	a	A
U19949.1.6.complete genome.ATL-YS.903...	.	Japan	Asia	a	B
AF259264.1.7.complete genome.WHP.9034...	P	China	Asia	a	A
AF033817.1.8.complete genome..8507.a.C	.	USA	North America	a	C
AY563953.1.9.complete genome..8383.a.A	.	Brazil	South America	a	A
AY563954.1.10.complete genome.BRRP438...	.	Brazil	South America	a	A
AB273635.1.11.complete genome..9033.a.A	.	Japan	Asia	a	A
L02534.1.12.complete genome.mel5.9039.c.	.	Solomon Islands	Oceania	c
L36905.1.13.complete genome.Boi.9035.a.A	.	France	Europe	a	A
HQ606137.1.14.complete genome.1066/05...	.	Canada	North America	a	A
HQ606138.1.15.complete genome.1067/05...	.	Canada	North America	a	A
JX507077.16.complete genome.SF26.9023.b.	.	Brazil	South America	b
X56949.2.38.env.MT-2.1467.a.A	.	France	Europe	a	A
AY604935.1.40.env.PAR.1467.a.B	.	Iran	Asia	a	A
AY604934.1.41.env.IP60-A.1467.a.	.	French Guiana	South America	a	C
AY604933.1.42.env.2947.1467.b.	.	Gabon	Africa	b
AY604932.1.43.env.2946.1467.b.	.	Gabon	Africa	b
AY604931.1.44.env.2922.1467.b.	.	Gabon	Africa	b
AY604930.1.45.env.2917.1467.b.	.	Gabon	Africa	b
AY604929.1.46.env.2903.1467.b.	.	Gabon	Africa	b
AY604928.1.47.env.2902.1467.b.	.	Gabon	Africa	b
AY604927.1.48.env.2900.1467.b.	.	Gabon	Africa	b
AY604926.1.49.env.2899.1467.b.	.	Gabon	Africa	b
AY604925.1.50.env.2886.1467.b.	.	Gabon	Africa	b
AY604924.1.51.env.2885.1467.b.	.	Gabon	Africa	b
AY604923.1.52.env.2864.1467.b.	.	Gabon	Africa	b
AY604922.1.53.env.2857.1467.b.	.	Gabon	Africa	b
AY604921.1.54.env.2824.1467.b.	.	Gabon	Africa	b
AY604920.1.55.env.2822.1467.b.	.	Gabon	Africa	b
AY604919.1.56.env.2821.1467.b.	.	Gabon	Africa	b
AY604918.1.57.env.2808.1467.b.	.	Gabon	Africa	b
AY604917.1.58.env.2806.1467.b.	.	Gabon	Africa	b
AY604916.1.59.env.2801.1467.b.	.	Gabon	Africa	b
AY604913.1.62.env.2608.1467.a.E	.	Guadeloupe	Central America	a	A
AY604912.1.63.env.2607.1467.a.C	.	Guadeloupe	Central America	a	A
AY604910.1.65.env.2605.1467.a.E	.	Guadeloupe	Central America	a	A
AY604909.1.66.env.2601.1467.a.C	.	Guadeloupe	Central America	a	A
AY604908.1.67.env.2551.1467.b.	.	Gabon	Africa	b
AY604907.1.68.env.2550.1467.b.	.	Gabon	Africa	b
AY604906.1.69.env.2515.1467.b.	.	Gabon	Africa	b
AY604905.1.70.env.2513.1467.a.	.	Gabon	Africa	a	A
AY604904.1.71.env.2510.1467.b.	.	Gabon	Africa	b
AY604903.1.72.env.2504.1467.b.	.	Gabon	Africa	b
AY604902.1.73.env.2378.1467..	.	Gabon	Africa	b
AY604901.1.74.env.2377.1467..	.	Gabon	Africa	b
AY604900.1.75.env.2371-2.1467.b.	.	Gabon	Africa	b
AY604899.1.76.env.2371-1.1467.b.	.	Gabon	Africa	b
AY604898.1.77.env.2313.1467.b.	.	Gabon	Africa	b
AY604897.1.78.env.2307.1467.b.	.	Gabon	Africa	b
AY604896.1.79.env.2306.1467.b.	.	Gabon	Africa	b
AY604895.1.80.env.2303.1467.a.C	.	Gabon	Africa	a	C
AY604894.1.81.env.2163.1467.a.	.	French Guiana	South America	a	A
AY604893.1.82.env.2139.1467.a.C	.	Guadeloupe	Central America	a	A
AY604891.1.84.env.2137.1467.a.	.	Guadeloupe	Central America	a	A
AY604890.1.85.env.2136.1467.a.	.	Guadeloupe	Central America	a	A
AY604889.1.86.env.2134-2.1467.a.	.	Guadeloupe	Central America	a	C
AY604888.1.87.env.2134-1.1467.a.C	.	Guadeloupe	Central America	a	A
AY604887.1.88.env.2132.1467.a.C	.	Guadeloupe	Central America	a	A
AY604886.1.89.env.2093-A.1467.a.C	.	Martinique	Central America	a	A
AY604885.1.90.env.2091-A.1467.a.C	.	Martinique	Central America	a	A
AY604884.1.91.env.2084-A.1467.a.	.	Martinique	Central America	a	A
AY604883.1.92.env.2067.1467.a.E	.	French Guiana	South America	a	A
AY604882.1.93.env.2065.1467.a.	.	French Guiana	South America	a	A
AY604881.1.94.env.2061.1467.a.C	.	French Guiana	South America	a	A
AY604880.1.95.env.2059.1467.a.	.	French Guiana	South America	a	A
AY604879.1.96.env.2055-A.1467.a.	.	French Guiana	South America	a	C
AY604878.1.97.env.2053.1467.a.	.	French Guiana	South America	a	C
AY604877.1.98.env.2051.1467.a.	.	French Guiana	South America	a	A
AY604876.1.99.env.2050.1467.a.	.	French Guiana	South America	a	C
AY604875.1.100.env.2049-A.1467.a.	.	French Guiana	South America	a	C
AY604874.1.101.env.2036-A.1467.a.	.	French Guiana	South America	a	C
AF092065.1.117.env.IP100.940..	.	French Guiana	South America	a	C
AF091500.1.118.env.IP74.940..	.	French Guiana	South America	a	C
AF091499.1.119.env.IP71.940..	.	French Guiana	South America	a	C
AF091498.1.120.env.IP70.940..	.	French Guiana	South America	a	C
AF091497.1.121.env.IP66.940..	.	French Guiana	South America	a	C
AF091496.1.122.env.IP60.940..	.	French Guiana	South America	a	C
AF091495.1.123.env.2329.940..	.	Gabon	Africa	a	C
AF091494.1.124.env.2318.940.a.	.	Gabon	Africa	a	C
L76067.2.194.env.2086.940..	.	Martinique	Central America	a	A
L76050.2.195.env.2031.940..	.	French Guiana	South America	a	A
L76060.2.196.env.2071.940..	.	Martinique	Central America	a	A
L76058.2.197.env.2058.940..	.	French Guiana	South America	a	A
L76056.2.198.env.2055.940..	.	French Guiana	South America	a	C
L76054.2.199.env.2049.940..	.	French Guiana	South America	a	A
L76053.2.200.env.2037.940..	.	French Guiana	South America	a	C
L76052.2.201.env.2036.940..	.	French Guiana	South America	a	C
L76049.2.202.env.2014.940..	.	French Guiana	South America	a	A
L76048.2.203.env.2011.940..	.	French Guiana	South America	a	A
L76039.2.204.env.2420 ATL.790..	.	French Guiana	South America	b
L76057.2.205.env.2056.940..	.	French Guiana	South America	a	A
L76059.2.207.env.2060.940..	.	French Guiana	South America	a	A
L76061.2.208.env.2072.940..	.	Martinique	Central America	a	A
L76066.2.209.env.2085.940..	.	Martinique	Central America	a	A
L76072.1.210.env.2097.940..	.	Martinique	Central America	a	A
L76071.1.211.env.2093.930..	.	Martinique	Central America	a	A
L76070.1.212.env.2092.930..	.	Martinique	Central America	a	A
L76069.1.213.env.2091.930..	.	Martinique	Central America	a	A
L76055.1.214.env.2052.940..	.	French Guiana	South America	a	A
L76051.1.215.env.2032.940..	.	French Guiana	South America	a	A
DQ663636.1.268.env.PtAd.1289.a.A	.	Portugal	Europe	a	A
DQ663634.1.270.env.PrGr.1422..	.	Portugal	Europe	a	A
DQ663648.1.257.env.PtOs.1407..	.	Portugal	Europe	a	A
DQ663647.1.258.env.PtFd.1313..	.	Portugal	Europe	a	A
DQ663646.1.259.env.PtOf.1413.a.A	.	Portugal	Europe	a	A
DQ663645.1.260.env.PtDj.1399..	.	Portugal	Europe	a	A
DQ663644.1.261.env.PtNs.1412.a.A	.	Portugal	Europe	a	A
DQ663643.1.262.env.PtCr.1372.a.A	.	Portugal	Europe	a	C
DQ663641.1.263.env.PtIs.1412.a.A	.	Portugal	Europe	a	A
DQ663640.1.264.env.PtJq.1403.a.A	.	Portugal	Europe	a	A
DQ663639.1.265.env.PtLc.1411.a.A	.	Portugal	Europe	a	A
DQ663637.1.266.env.PtEr.1405.a.A	.	Portugal	Europe	a	A
DQ663638.1.267.env.PtDk1.1423.a.C	.	Portugal	Europe	a	C
DQ663635.1.269.env.PtMm.1403..	.	Portugal	Europe	a	C
DQ663633.1.271.env.PtPd.1399..	.	Portugal	Europe	a	C
L13774.1.276.env..939..	.	Chile	South America	a	A
L02533.1.277.env.mel1.1392..	.	Papua New Guinea	Oceania	c
M37747.1.278.env.MT-2.1530.a.A	.	Japan	Asia	a	A
M61048.1.279.env.HUT102.640.a.A	.	USA	North America	a	A
M61049.1.280.env.JA-1.640..	.	Japan	Asia	a	B
M61050.1.281.env.JA-2.640..	.	Japan	Asia	a	B
M61051.1.282.env.HUT102.640.a.A	.	USA	North America	a	A
M61052.1.283.env.AF-1.640..	.	Africa	Africa	a	C
M61053.1.284.env.AF-2.640..	.	Africa	Africa	a	C
M61054.1.285.env.AF-3.640..	.	Africa	Africa	a	C
M61055.1.286.env.AF-4.640..	.	Africa	Africa	a	C
M61056.1.287.env.AF-5.640..	.	Africa	Africa	a	C
M61057.1.288.env.AF-6.640..	.	Africa	Africa	a	C
M61058.1.289.env.MT-2.640.a.A	.	Japan	Asia	a	B
M61059.1.290.env.ATK-1.640.a.B	.	Japan	Asia	a	B
M64263.1.291.env.US-1.640..	.	USA	North America	a	E?
M64264.1.292.env.US-2.640..	.	USA	North America	a	E?
S67869.1.303.env.CMCH 1.325..	.	India	Asia	a	A
U81862.1.380.env.H990.1467.a.	.	Romania	Europe	a	A
U81863.1.381.env.Pt18ATL.1467.a.	.	Caribbean	Central America	a	A
U81864.1.382.env.pt1ATL.1467.a.	.	Caribbean	Central America	a	A
U81865.1.383.env.pt12ATL.1467.a.	.	Brazil	South America	a	A
U81866.1.384.env.pt3ATL.1467.a.	.	Brazil	South America	a	A
U81867.1.385.env.pt5ATL.1467.a.	.	Brazil	South America	a	A
U81868.1.386.env.pt8ATL.1467.a.	.	Brazil	South America	a	A
U81869.1.387.env.pt9ATL.1467.a.	.	Brazil	South America	a	A
E02797.1.468.env..1561.a.	.	Japan	Asia	a	B
AF003009.1.469.env.RKI1-Iran.1587.a.	.	Iran	Asia	a	A
AF003011.1.470.env.RKI12-Rum.1600.a.	.	Romania	Europe	a	A
AF154339.1.485.env.KZN49.597..	.	South Africa	Africa	a	A
AF154338.1.484.env.KZN48.629..	.	South Africa	Africa	a	A
AF154340.1.486.env.KZN68.629..	.	South Africa	Africa	a	A
AF154341.1.487.env.KZN61.629..	.	South Africa	Africa	a	A
AF154342.1.488.env.KZN62.629..	.	South Africa	Africa	a	A
AF029074.1.474.env.IP084.961..	.	French Guiana	South America	a	C
AF029072.1.472.env.IP145.961..	.	French Guiana	South America	a	C
L76040.1.476.env.Patient 2449 French ...	.	French Guiana	South America	a	C
L76042.2.477.env.2704.940..	.	Guadeloupe	Central America	a	A
L76043.2.478.env.Patient 2705 Ocular ...	.	Guadeloupe	Central America	a	A
L76044.2.479.env.Patient 2707 Ocular ...	.	Guadeloupe	Central America	a	A
L76045.2.480.env.Patient 2709 Ocular ...	.	Guadeloupe	Central America	a	A
L76046.2.481.env.Patient 2711 Ocular ...	.	Guadeloupe	Central America	a	A
L76047.2.482.env.Patient 2712 Ocular ...	.	Guadeloupe	Central America	a	A
L76041.2.483.env.Patient 2703 TSP Gua...	.	Guadeloupe	Central America	a	A
AF077209.1.489.env.pt450.1344.a.A	.	Brazil	South America	a	A
AF250200.1.491.env.2555.1466..	.	Gabon	Africa	b
DQ663642.1.496.env.PtDk2.1412.a.A	.	Portugal	Europe	a	C
GU126484.1.501.env.ES-P9.1414.a.A	.	Spain	Europe	a	A
GU126485.1.502.env.ES-P7.1420.a.A	.	Colombia	South America	a	A
GU126486.1.503.env.ES-P6.1418.a.A	.	Spain	Europe	a	A
GU126487.1.504.env.ES-P4b.1200.a.A	.	Peru	South America	a	A
GU126488.1.505.env.ES-P10.1418.a.A	.	Spain	Europe	a	A
GU126489.1.506.env.ES-P2.1424.a.A	.	Spain	Europe	a	A
GU126490.1.507.env.ES-P5.1406..	.	Spain	Europe	a	A
AB600229.1.531.env.3902038.1467.a.	.	Japan	Asia	a	A
AB600227.1.532.env.47011009.1467.a.	P	Japan	Asia	a	A
AB600225.1.533.env.42030629.1467.a.	.	Japan	Asia	a	B
AB600224.1.534.env.42030621.1467.a.	.	Japan	Asia	a	B
AB600204.1.535.env.04viii08-01.1467.a.A	.	Japan	Asia	a	A
AB600205.1.536.env.04viii08-03.1467.a.B	.	Japan	Asia	a	B
AB600206.1.537.env.08viii08-03.1467.a.B	.	Japan	Asia	a	B
AB600207.1.538.env.14viii08-06.1467.a.A	.	Japan	Asia	a	A
AB600208.1.539.env.14viii08-04.1467.a.	.	Japan	Asia	a	B
AB600209.1.540.env.16viii08-02.1467.a.A	.	Japan	Asia	a	A
AB600210.1.541.env.01011023.1467.a.	.	Japan	Asia	a	A
AB600211.1.542.env.01011024.1467.a.	.	Japan	Asia	a	B
AB600212.1.543.env.01011035.1467.a.	.	Japan	Asia	a	A
AB600213.1.544.env.01011056.1467.a.	P	Japan	Asia	a	A
AB600214.1.545.env.3902014.1467.a.	.	Japan	Asia	a	B
AB600215.1.546.env.3902028.1467.a.	P	Japan	Asia	a	A
AB600216.1.547.env.3902030.1467.a.	.	Japan	Asia	a	B
AB600217.1.548.env.3902037.1467.a.	P	Japan	Asia	a	A
AB600218.1.549.env.4301017.1467.a.	.	Japan	Asia	a	B
AB600219.1.550.env.4701052.1467.a.	P	Japan	Asia	a	A
AB600220.1.551.env.4701054.1467.a.	P	Japan	Asia	a	A
AB600221.1.552.env.4701059.1467.a.	P	Japan	Asia	a	A
AB600222.1.553.env.4701063.1467.a.	.	Japan	Asia	a	B
AB600223.1.554.env.4701094.1467.a.	.	Japan	Asia	a	B
AB600226.1.555.env.43011009.1467.a.	.	Japan	Asia	a	B
AB600228.1.556.env.03011001.1467.a.	.	Japan	Asia	a	B
AF405349.1.577.env.Co-012.1467.a.	.	Colombia	South America	a	A
AF405348.1.578.env.Co-011.1467.a.	.	Colombia	South America	a	A
AF405347.1.579.env.Co-010.1467.a.	.	Colombia	South America	a	A
AF405346.1.580.env.Co-009.1467.a.	.	Colombia	South America	a	A
AF405345.1.581.env.Co-008.1467.a.	.	Colombia	South America	a	A
AF405344.1.582.env.Co-007.1467.a.	.	Colombia	South America	a	A
AF405343.1.583.env.Co-006.1467.a.	.	Colombia	South America	a	A
AF405342.1.584.env.Co-005.1467.a.	.	Colombia	South America	a	A
AF405341.1.585.env.Co-004.1467.a.	.	Colombia	South America	a	A
AF405340.1.586.env.Co-003.1467.a.	.	Colombia	South America	a	A
AF405339.1.587.env.Co-002.1467.a.	.	Colombia	South America	a	A
AF405338.1.588.env.Co-001.1467.a.	.	Colombia	South America	a	A
AY549882.2.594.env.VAN-136.1388.c.	.	Melanesia	Oceania	c
EF061885.1.605.env.ESH18.1388..	.	Melanesia	Oceania	c
EF061886.1.606.env.ESW44.1388..	.	Melanesia	Oceania	c
EF061884.1.627.env.EM5.1388..	.	Melanesia	Oceania	c
AF438764.1.680.env.case 13.963..	P	Japan	Asia	a	A
AF438763.1.681.env.case 12.936..	.	Japan	Asia	a	A
AF438762.1.682.env.case 7.936..	.	Japan	Asia	a	A
AF438761.1.683.env.case 3.936.a.B	.	Japan	Asia	a	B
AF438760.1.684.env.case 11.936..	.	Japan	Asia	a	B
AF438759.1.685.env.case 10.936..	P	Japan	Asia	a	A
AF438758.1.686.env.case 9.936..	.	Japan	Asia	a	B
AF438757.1.687.env.case 8.936..	.	Japan	Asia	a	B
AF438756.1.688.env.case 6.936..	.	Japan	Asia	a	B
AF438755.1.689.env.case 5.936..	.	Japan	Asia	a	A
M37301.1.756.env-pX..3233.a.	.	Canada	North America	a	A
U32558.1.659.env.BCI4-1.663.a.	.	Canada	North America	a	A
U32556.1.660.env.BCI1-2.1365.a.	.	Canada	North America	a	A
U32555.1	.	Canada	North America	a	A
U32554.1.662.env.BCI2-1.1365.a.	.	Canada	North America	a	A
U32553.1.663.env.BCI3-1.663.a.	.	Canada	North America	a	A
AF438754.1.690.env.case 4.936..	.	Japan	Asia	a	B
AF438753.1.691.env.case 1.936..	.	Japan	Asia	a	B
AF438752.1.692.env.case 2.936.a.B	.	Japan	Asia	a	B
L26585.1.709.env.2030.940..	.	Gabon	Africa	a	C
L26586.1.710.env.2313.940..	.	Gabon	Africa	b
L33265.1.711.env.2315.940..	.	Gabon	Africa	b
L33266.1.712.env.2316.940..	.	Gabon	Africa	a	C
AF226594.2.753.env.htlv446.966..	.	China	Asia	a	A
L03562.2.763.gag-pol-env-pX..9033..	.	USA	North America	a	A
U53031.1.713.env.TAB10.325..	.	Taiwan	Asia	a	A
U53029.1.715.env.TAB8.325..	.	Taiwan	Asia	a	A
U53030.1.714.env.TAB9.325..	P	Taiwan	Asia	a	A
U53028.1.716.env.TAB4.325..	P	Taiwan	Asia	a	A
U53027.1.717.env.TAB3.325..	.	Taiwan	Asia	a	A
U53026.1.718.env.TAB1.325..	P	Taiwan	Asia	a	A
U53025.1.719.env.TAA9.325..	P	Taiwan	Asia	a	A
U53021.1.720.env.TAA4.325..	.	Taiwan	Asia	a	A
U53022.1.721.env.TAA5.325..	.	Taiwan	Asia	a	A
U53023.1.722.env.TAA6 .325..	.	Taiwan	Asia	a	A
U53024.1.723.env.TAA8 .325..	.	Taiwan	Asia	a	A

## Sheet: Sheet10
			AB600229.1	Japan	Asia	a
			AB600227.1	Japan	Asia	a
			AB600225.1	Japan	Asia	a
			AB600224.1	Japan	Asia	a
			AB600204.1	Japan	Asia	a	A
			AB600205.1	Japan	Asia	a	B
			AB600206.1	Japan	Asia	a	B
			AB600207.1	Japan	Asia	a	A
			AB600208.1	Japan	Asia	a
			AB600209.1	Japan	Asia	a	A
			AB600210.1	Japan	Asia	a
			AB600211.1	Japan	Asia	a
			AB600212.1	Japan	Asia	a
			AB600213.1	Japan	Asia	a
			AB600214.1	Japan	Asia	a
			AB600215.1	Japan	Asia	a
			AB600216.1	Japan	Asia	a
			AB600217.1	Japan	Asia	a
			AB600218.1	Japan	Asia	a
			AB600219.1	Japan	Asia	a
			AB600220.1	Japan	Asia	a
			AB600221.1	Japan	Asia	a
			AB600222.1	Japan	Asia	a
			AB600223.1	Japan	Asia	a
			AB600226.1	Japan	Asia	a
			AB600228.1	Japan	Asia	a

## Sheet: Sheet9
			GU126484.1	Spain	Europe	a	A
			GU126485.1	Colombia	South America	a	A
			GU126486.1			a	A
			GU126487.1	Peru	South America	a	A
			GU126488.1	Spain	Europe	a	A
			GU126489.1	Spain	Europe	a	A
			GU126490.1	Spain	Europe

## Sheet: Info
Title
Format
DataType	Protein
251
Number Sites	489
Identical	.
Missing	?
Indel	-
